# Supplementary material for: Aluminum interaction with 2,3-diphosphoglyceric acid. A computational study
Source: Royal Society of Chemistry journal article supplement (doi:10.1039/c5ra06796k), 2015-01-01

## Aluminum interaction with 2-3-diphosphoglyceric acid. A computational study.

*Noelia Luque<sup>1</sup>, Jon I. Mujika<sup>1</sup>, Elena Formoso<sup>1</sup> and Xabier Lopez<sup>1</sup>*

<sup>1</sup>Kimika Fakultatea, Euskal Herriko Unibertsitatea UPV/EHU, and Donostia International Physics Center (DIPC), P.K. 1072, 20080 Donostia, Euskadi, Spain.

### Supporting Information List:

1. Methodology assessment (Table S1)
2. The studied 13 Al-(2,3-DPG) complexes (Figure S2).
3. The studied 7 Al-(2,3-DPG)(Citr) complexes (Figure S3).

### 1 Methodology assessment

In order to assess that the methodology employed in this article was reliable, single-point calculations were carried out at the B3LYP/6-31++G(d,p) optimized structures by using three functionals (PBE0, M06-2X and BP86) and a triple- $\zeta$  basis set (6-311++G(3df,2p)). The results are shown in Table S1, and compared with the original values computed at B3LYP/6-311++G(3df,2p) (Figure 1).

Table S1: Reaction energies in kcal mol<sup>-1</sup> at physiological pH calculated with different DFT functionals: B3LYP, PBE0, M06-2X and BP86. The same basis set (6-311++G(3df,2p)) was employed for all the calculations.

| Structure                                                                               | $\Delta G_{aq}^{Phys}$ (B3LYP) | $\Delta G_{aq}^{Phys}$ (PBE0) | $\Delta G_{aq}^{Phys}$ (M06-2X) | $\Delta G_{aq}^{Phys}$ (BP86) |
|-----------------------------------------------------------------------------------------|--------------------------------|-------------------------------|---------------------------------|-------------------------------|
| Complexes 1:1                                                                           |                                |                               |                                 |                               |
| [Al(DPG) <sub>AC</sub> (H <sub>2</sub> O) <sub>4</sub> ] <sup>2-</sup>                  | -118.40                        | -122.57                       | -124.90                         | -120.01                       |
| [Al(DPG) <sub>AC</sub> (H <sub>2</sub> O) <sub>4</sub> ] <sup>1-</sup>                  | -99.05                         | -103.85                       | -106.67                         | -102.29                       |
| [Al(DPG) <sub>BC</sub> (H <sub>2</sub> O) <sub>4</sub> ] <sup>2-</sup>                  | -102.82                        | -106.62                       | -108.24                         | -105.26                       |
| [Al(DPG) <sub>BC</sub> (H <sub>2</sub> O) <sub>4</sub> ] <sup>1-</sup>                  | -95.43                         | -99.04                        | -100.70                         | -97.63                        |
| [Al(DPG) <sub>AB</sub> (H <sub>2</sub> O) <sub>4</sub> ] <sup>2-</sup>                  | -119.33                        | -123.42                       | -125.87                         | -121.13                       |
| [Al(DPG) <sub>ABC</sub> (H <sub>2</sub> O) <sub>3</sub> ] <sup>2-</sup>                 | -123.54                        | -128.95                       | -132.00                         | -127.86                       |
| [Al(Citr)(H <sub>2</sub> O) <sub>3</sub> ] <sup>1-</sup>                                | -123.46                        | -127.18                       | -125.00                         | -124.97                       |
| Complexes 1:2                                                                           |                                |                               |                                 |                               |
| [Al(DPG) <sub>2,AC</sub> (H <sub>2</sub> O) <sub>2</sub> ] <sup>7-</sup>                | -134.01                        | -139.71                       | -143.31                         | -136.75                       |
| [Al(DPG) <sub>2,AC</sub> <sup>†</sup> (H <sub>2</sub> O) <sub>2</sub> ] <sup>5-</sup>   | -127.06                        | -132.43                       | -136.01                         | -129.25                       |
| [Al(DPG) <sub>2,AC</sub> <sup>‡</sup> (H <sub>2</sub> O) <sub>2</sub> ] <sup>5-</sup>   | -118.34                        | -123.63                       | -129.72                         | -120.28                       |
| [Al(DPG) <sub>2,AC</sub> <sup>*</sup> (H <sub>2</sub> O) <sub>2</sub> ] <sup>5-</sup>   | -116.34                        | -121.71                       | -125.64                         | -118.59                       |
| [Al(DPG) <sub>2,AC</sub> <sup>***</sup> (H <sub>2</sub> O) <sub>2</sub> ] <sup>6-</sup> | -133.66                        | -139.29                       | -142.98                         | -136.31                       |
| [Al(DPG) <sub>2,AC</sub> <sup>*</sup> (H <sub>2</sub> O) <sub>2</sub> ] <sup>7-</sup>   | -130.03                        | -135.11                       | -140.40                         | -132.35                       |
| [Al(DPG) <sub>2,AB</sub> (H <sub>2</sub> O) <sub>2</sub> ] <sup>7-</sup>                | -136.85                        | -143.07                       | -149.13                         | -139.25                       |
| [Al(DPG) <sub>2,AB</sub> <sup>†</sup> (H <sub>2</sub> O) <sub>2</sub> ] <sup>5-</sup>   | -119.36                        | -125.54                       | -132.85                         | -121.61                       |
| [Al(DPG) <sub>2,AB</sub> <sup>‡</sup> (H <sub>2</sub> O) <sub>2</sub> ] <sup>5-</sup>   | -122.66                        | -129.15                       | -137.54                         | -124.25                       |
| [Al(DPG) <sub>2,AB</sub> <sup>**</sup> (H <sub>2</sub> O) <sub>2</sub> ] <sup>5-</sup>  | -116.56                        | -122.05                       | -128.77                         | -118.06                       |
| [Al(DPG) <sub>2,AB</sub> <sup>*</sup> (H <sub>2</sub> O) <sub>2</sub> ] <sup>7-</sup>   | -140.89                        | -147.35                       | -153.84                         | -143.24                       |
| [Al(DPG) <sub>2,AB</sub> <sup>*†</sup> (H <sub>2</sub> O) <sub>2</sub> ] <sup>5-</sup>  | -123.74                        | -129.80                       | -139.29                         | -124.98                       |
| [Al(DPG) <sub>2,ABC</sub> ] <sup>7-</sup>                                               | -128.43                        | -137.66                       | -144.18                         | -118.81                       |
| [Al(Citr) <sub>2</sub> ] <sup>5-</sup>                                                  | -181.28                        | -184.37                       | -179.10                         | -181.25                       |
| Complexes 1:1:1                                                                         |                                |                               |                                 |                               |
| [Al(DPG) <sub>AC</sub> (Citr)(H <sub>2</sub> O)] <sup>6-</sup>                          | -161.39                        | -165.83                       | -166.12                         | -162.08                       |
| [Al(DPG) <sub>AC</sub> <sup>***</sup> (Citr)(H <sub>2</sub> O)] <sup>5-</sup>           | -156.79                        | -148.47                       | -150.24                         | -144.46                       |
| [Al(DPG) <sub>AB</sub> (Citr)(H <sub>2</sub> O)] <sup>6-</sup>                          | -156.64                        | -161.03                       | -162.34                         | -156.94                       |
| [Al(DPG) <sub>AB</sub> <sup>***</sup> (Citr)(H <sub>2</sub> O)] <sup>5-</sup>           | -144.17                        | -161.01                       | -161.37                         | -157.02                       |
| [Al(DPG) <sub>AB</sub> <sup>****</sup> (Citr)(H <sub>2</sub> O)] <sup>5-</sup>          | -152.52                        | -157.07                       | -158.92                         | -152.90                       |
| [Al(DPG) <sub>ABC</sub> (Citr)] <sup>6-</sup>                                           | -157.82                        | -160.52                       | -160.24                         | -157.90                       |
| [Al(DPG) <sub>ABC</sub> <sup>***</sup> (Citr)] <sup>5-</sup>                            | -149.90                        | -152.49                       | -151.97                         | -150.08                       |

\* Different ligand substitution position. † Both phosphates of group B are protonated. ‡ Both phosphates of group A are protonated. \*\* Different phosphate group are protonated in each ligand. \*\*\* One phosphate of group B is protonated. \*\*\*\* One phosphate of group A is protonated.

Figure S2: The 13 studied 1:2 Al-(2,3-DPG) complexes. The subscripts indicate the coordination mode of 2,3-DPG to Al(III) and the superscripts refer to the protonation states of the phosphates groups: (bb) both phosphates of group B are protonated, (aa) both phosphates of group A are protonated, (ab) different phosphate groups are protonated in each ligand, (b) one phosphate of group B is protonated, (a) one phosphate of group A is protonated, \* different ligand substitution positions. The formation energies ( $\Delta G_{aq}^{Phys}$ ) are shown in kcal/mol.

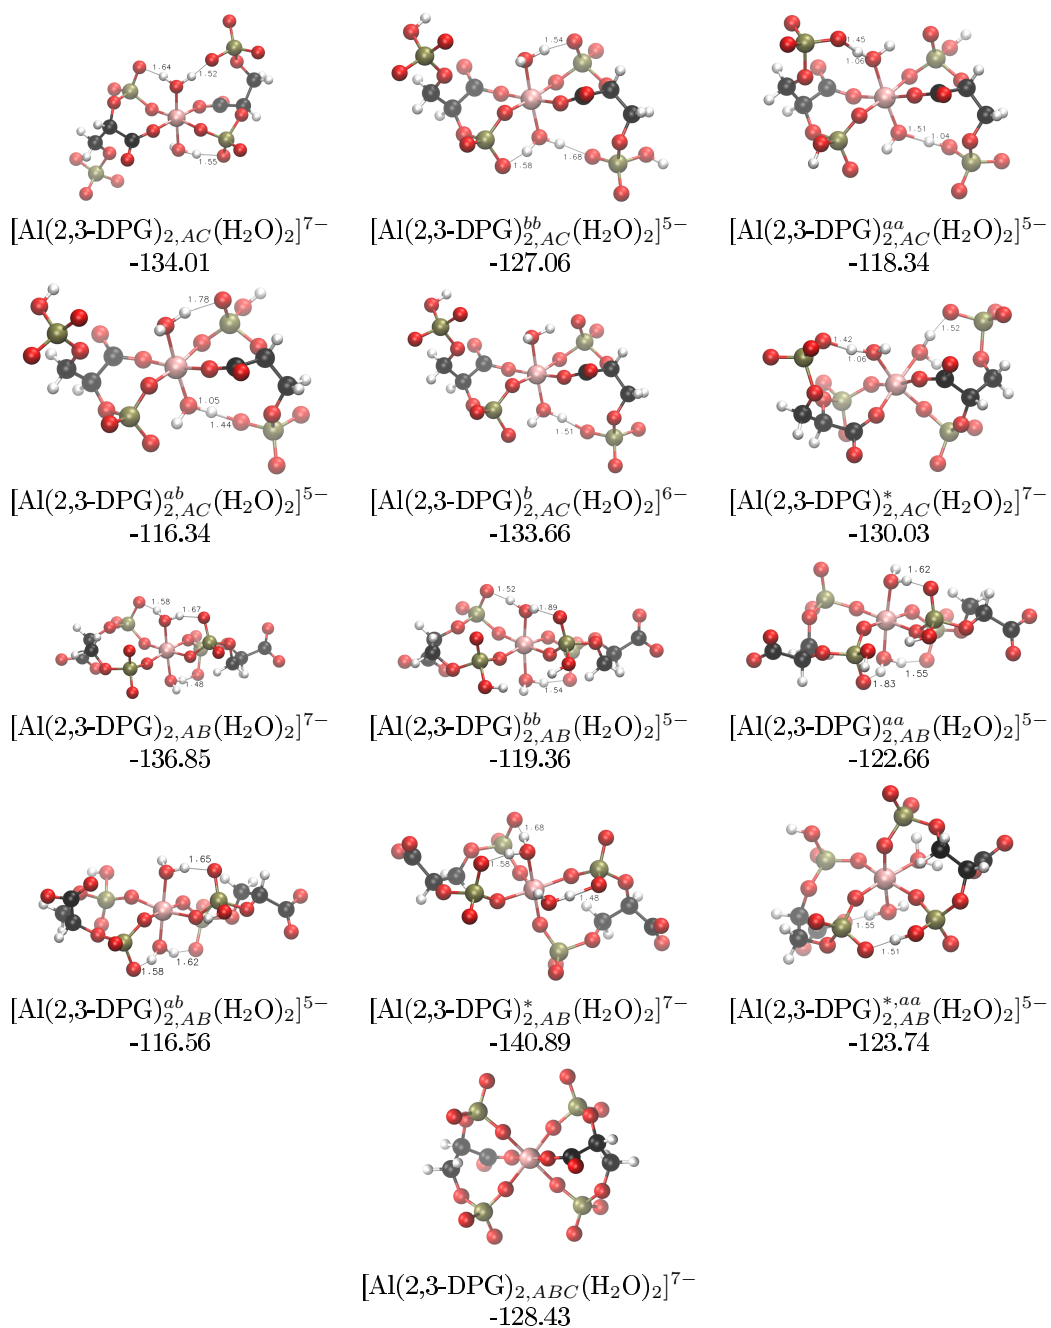

Figure S3: The 7 studied ternary structures, Al-(2,3-DPG)(Citr) complexes. The subscripts indicate the coordination mode of 2,3-DPG to Al(III) and the superscripts refer to the protonation states of the phosphates groups: (b) one phosphate of group B is protonated, (a) one phosphate of group A is protonated. The formation energies ( $\Delta G_{aq}^{Phys}$ ) are shown in kcal/mol.

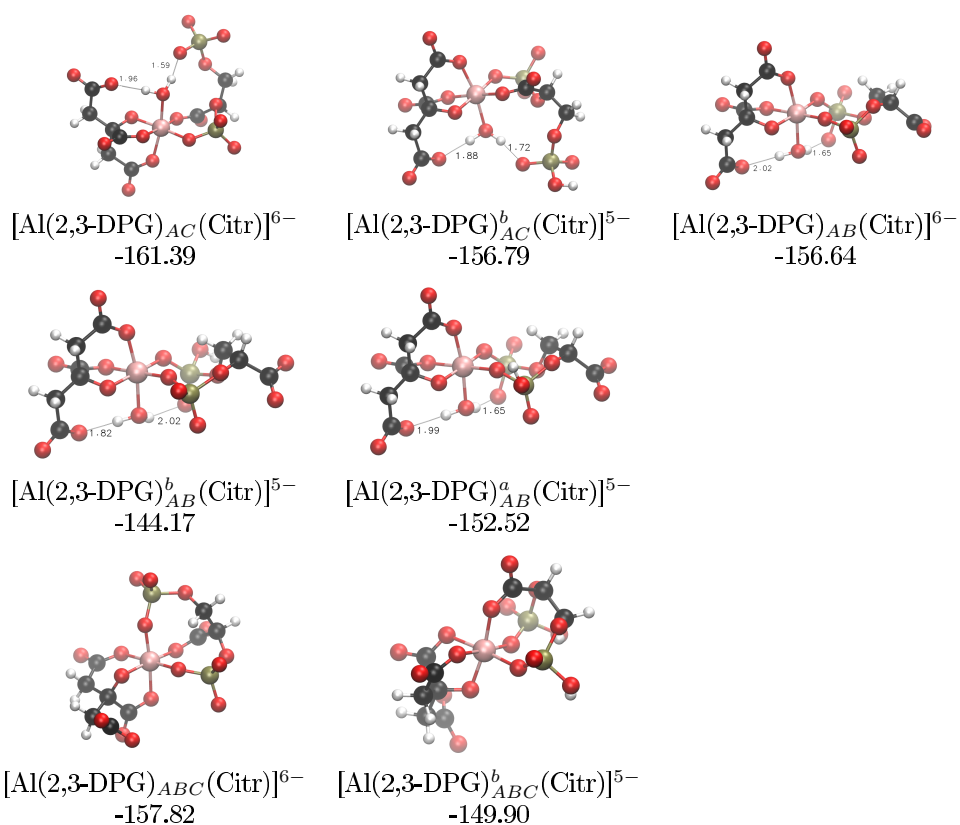

Supplement: c5ra06796k1.pdf [file c5ra06796k1.pdf]
